# Supplementary material for: Oceanic Core Complex or not?When partial spreading asymmetry triggers seafloor diversity
Source: Research Square preprint supplement (doi:10.21203/rs.3.rs-464587/v1), 2021-06-22
Supplement: Supplementary file 1 [file d3da63b7f473d3286b947af6.docx]

**Supplementary Information**

Processing methods significantly differ depending on the type of survey. Indeed, magnetic data collected at the sea surface are often acquired with a scalar magnetometer (i.e., measuring the intensity of the field regardless of its orientation) towed behind a ship at a sufficient distance, so that its magnetic impact would be negligible. In such case, magnetic anomalies are immediately obtained by subtracting the International Geomagnetic Reference Field (IGRF)(43) from the data.

When it comes to high-resolution surveys conducted by deep-sea exploration platforms (AUVs, ROVs or manned submersibles), magnetometers cannot be towed behind the submersibles because of the risk of collision with the seafloor and/or twisting the cable within the propeller. The magnetometer is directly mounted to flank of the submersible, however the proximity between the sensor and the submersible leads to a significant bias on the data, i.e., the magnetic influence of the submersible (its magnetic susceptibility tensor and remanent magnetization vector) has to be quantified and removed.

The most efficient way to get this estimation consists of using a calibration pattern at the beginning of the dives, when the submersible is far from the ship and the seafloor, so that the magnetic field measured at that time should be that predicted by the IGRF. Any observed variation can therefore be seen as a consequence of the magnetic influence of the vehicle(39, 40). The calibration pattern generally consists of "figures-8" followed by a succession of ascents and descents to mimic all possible attitude variations of the vehicle during the dive. Once quantified, the magnetic influence of the submersible is removed from the data using an improved least square method.

**References**

39 Honsho, C., et al. Magnetic structure of a slow-spreading ridge segment: Insight from near-bottom magnetic measurements onboard a submersible. *J. Geophys. Res.* **114**, B05101, (2009). doi:10.1029/2008JB005915.

40 Isezaki, N. A new shipboard three-component magnetometer. *Geophysics* **51**, 1992-1998 (1986).

43 Thébault, E., et al. (2015), International Geomagnetic Reference Field: the 12th generation. *Earth Planet. Sp.*, **67** (79) (2015) <https://doi.org/10.1186/s40623-015-0228-9>.
